# Supplementary material
Source: MDPI journal article supplement (https://www.mdpi.com/1424-8247/15/3/298)
Supplement: s1 [file s1]

**Table S1.** Database(s): Embase 1974 to 2020 July 22, Ovid MEDLINE(R) ALL 1946 to July 22, 2020.

| #  | Searches                                                                                                                                                                                                                                                                                                                                                                                                                                                                                                                                          | Results  |
|----|---------------------------------------------------------------------------------------------------------------------------------------------------------------------------------------------------------------------------------------------------------------------------------------------------------------------------------------------------------------------------------------------------------------------------------------------------------------------------------------------------------------------------------------------------|----------|
| 1  | exp Gender Identity/                                                                                                                                                                                                                                                                                                                                                                                                                                                                                                                              | 36797    |
| 2  | Sex Factors/                                                                                                                                                                                                                                                                                                                                                                                                                                                                                                                                      | 270976   |
| 3  | Sex Characteristics/                                                                                                                                                                                                                                                                                                                                                                                                                                                                                                                              | 55645    |
| 4  | (sex adj5 biological variable\$).tw,kf.                                                                                                                                                                                                                                                                                                                                                                                                                                                                                                           | 404      |
| 5  | (sex adj2 gender adj3 based).tw,kf.                                                                                                                                                                                                                                                                                                                                                                                                                                                                                                               | 276      |
| 6  | (SABV\$ or SGBA\$).tw,kf.                                                                                                                                                                                                                                                                                                                                                                                                                                                                                                                         | 91       |
| 7  | (gender adj2 (main stream\$ or mainstream\$)).tw,kf.<br>((sex\$ or gender\$) adj3 (analy\$ or aspect\$ or based or bias\$ or characteristic\$ or<br>comparison\$ or determinant\$ or differen\$ or dimorphism\$ or di-morphism\$ or<br>disparit\$ or distribut* or equalit\$ or equity or factor\$ or identit\$ or inequit\$ or<br>inequalit\$ or informed\$ or institutional\$ or integrated or interaction* or issue\$ or<br>medicine or minorit* or norm or norms or related or responsiv\$ or role\$ or<br>specific\$ or transform\$)).tw,kf. | 223      |
| 8  | specific\$ or transform\$)).tw,kf.                                                                                                                                                                                                                                                                                                                                                                                                                                                                                                                | 639634   |
| 9  | or/1-8 [Sex and Gender Concept]                                                                                                                                                                                                                                                                                                                                                                                                                                                                                                                   | 893598   |
| 10 | exp Drug Industry/<br>drug development/ or exp drug approval/ or exp drug design/ or drug evaluation/                                                                                                                                                                                                                                                                                                                                                                                                                                             | 127186   |
| 11 | or drug evaluation, preclinical/ or drug repositioning/                                                                                                                                                                                                                                                                                                                                                                                                                                                                                           | 489293   |
| 12 | Drug Discovery/                                                                                                                                                                                                                                                                                                                                                                                                                                                                                                                                   | 51759    |
| 13 | Drug Costs/<br>legislation, drug/ or "drug and narcotic control"/ or drug approval/ or drug recalls/                                                                                                                                                                                                                                                                                                                                                                                                                                              | 90180    |
| 14 | or safety-based drug withdrawals/<br>product surveillance, postmarketing/ or adverse drug reaction reporting systems/<br>or clinical trials, phase iv as topic/ or pharmacovigilance/ or prescription drug                                                                                                                                                                                                                                                                                                                                        | 93734    |
| 15 | monitoring programs/                                                                                                                                                                                                                                                                                                                                                                                                                                                                                                                              | 29677    |
| 16 | Precision Medicine/                                                                                                                                                                                                                                                                                                                                                                                                                                                                                                                               | 36854    |
| 17 | exp "Drug-Related Side Effects and Adverse Reactions"/                                                                                                                                                                                                                                                                                                                                                                                                                                                                                            | 645062   |
| 18 | ((drug\$ or pharm\$) adj3 (lifecycle\$ or life cycle\$)).tw,kf.                                                                                                                                                                                                                                                                                                                                                                                                                                                                                   | 658      |
| 19 | (precision adj (medicine or pharm\$)).tw,kf.                                                                                                                                                                                                                                                                                                                                                                                                                                                                                                      | 22449    |
| 20 | pharmacovigilan\$.tw,kf.<br>((drug\$ or pharm\$) adj2 (approv\$ or cost\$ or develop\$ or design\$ or discover\$ or<br>disposal\$ or evaluat\$ or industr\$ or legislat\$ or manufacture\$ or market\$ or<br>registrat\$ or regulat\$ or recall\$ or reposition\$ or re-position\$ or research\$ or policy<br>or policies or service\$)).tw,kf.                                                                                                                                                                                                   | 15321    |
| 21 | or policies or service\$)).tw,kf.                                                                                                                                                                                                                                                                                                                                                                                                                                                                                                                 | 508036   |
| 22 | or/10-21 [Drug Life Cycle Concept]                                                                                                                                                                                                                                                                                                                                                                                                                                                                                                                | 1765219  |
| 23 | 9 and 22                                                                                                                                                                                                                                                                                                                                                                                                                                                                                                                                          | 11336    |
| 24 | limit 23 to yr="2010 -Current"                                                                                                                                                                                                                                                                                                                                                                                                                                                                                                                    | 7195     |
| 25 | exp Animals/ not (exp Animals/ and Humans/)                                                                                                                                                                                                                                                                                                                                                                                                                                                                                                       | 16703431 |
| 26 | 24 not 25                                                                                                                                                                                                                                                                                                                                                                                                                                                                                                                                         | 4273     |
| 27 | limit 26 to english language                                                                                                                                                                                                                                                                                                                                                                                                                                                                                                                      | 4158     |
| 28 | 27 use medall                                                                                                                                                                                                                                                                                                                                                                                                                                                                                                                                     | 1835     |
| 29 | exp gender identity/                                                                                                                                                                                                                                                                                                                                                                                                                                                                                                                              | 36797    |

|                                                                                                                                                                                                                                                                                                                                                                                                                                         |         |
|-----------------------------------------------------------------------------------------------------------------------------------------------------------------------------------------------------------------------------------------------------------------------------------------------------------------------------------------------------------------------------------------------------------------------------------------|---------|
| 30 exp sex difference/                                                                                                                                                                                                                                                                                                                                                                                                                  | 429582  |
| 31 "gender and sex"/                                                                                                                                                                                                                                                                                                                                                                                                                    | 1034    |
| 32 (sex adj5 biological variable\$.tw,kw.                                                                                                                                                                                                                                                                                                                                                                                               | 404     |
| 33 (sex adj2 gender adj3 based).tw,kw.                                                                                                                                                                                                                                                                                                                                                                                                  | 274     |
| 34 (SABV\$ or SGBA\$).tw,kw.                                                                                                                                                                                                                                                                                                                                                                                                            | 98      |
| 35 (gender adj2 (main stream\$ or mainstream\$)).tw,kw.                                                                                                                                                                                                                                                                                                                                                                                 | 231     |
| ((sex\$ or gender\$) adj3 (analy\$ or aspect\$ or based or bias\$ or characteristic\$ or comparison\$ or determinant\$ or differen\$ or dimorphism\$ or di-morphism\$ or disparit\$ or distribut* or equalit\$ or equity or factor\$ or identit\$ or inequit\$ or inequalit\$ or informed\$ or institutional\$ or integrated or interaction* or issue\$ or medicine or minorit* or norm or norms or related or responsiv\$ or role\$ or |         |
| 36 specific\$ or transform\$)).tw,kw.                                                                                                                                                                                                                                                                                                                                                                                                   | 641489  |
| 37 or/29-36 [Sex and Gender Concept]                                                                                                                                                                                                                                                                                                                                                                                                    | 942005  |
| 38 drug industry/ or drug packaging/ or drug labeling/                                                                                                                                                                                                                                                                                                                                                                                  | 142880  |
| 39 drug development/ or drug design/ or polypharmacology/ or drug approval/                                                                                                                                                                                                                                                                                                                                                             | 204562  |
| drug analysis/ or drug determination/ or drug discrimination/ or drug                                                                                                                                                                                                                                                                                                                                                                   |         |
| 40 repositioning/                                                                                                                                                                                                                                                                                                                                                                                                                       | 194578  |
| 41 "drug cost"/ or drug legislation/                                                                                                                                                                                                                                                                                                                                                                                                    | 116176  |
| drug control/ or drug approval/ or drug formulary/ or drug legislation/ or drug                                                                                                                                                                                                                                                                                                                                                         |         |
| 42 program/ or drug recall/                                                                                                                                                                                                                                                                                                                                                                                                             | 98797   |
| exp postmarketing surveillance/ or exp pharmacovigilance/ or "phase 4 clinical trial                                                                                                                                                                                                                                                                                                                                                    |         |
| 43 (topic)"/ or prescription drug monitoring program/                                                                                                                                                                                                                                                                                                                                                                                   | 41434   |
| 44 Precision Medicine/                                                                                                                                                                                                                                                                                                                                                                                                                  | 36854   |
| 45 adverse drug reaction/                                                                                                                                                                                                                                                                                                                                                                                                               | 270252  |
| 46 ((drug\$ or pharm\$) adj3 (lifecycle\$ or life cycle\$)).tw,kw.                                                                                                                                                                                                                                                                                                                                                                      | 679     |
| 47 (precision adj (medicine or pharm\$)).tw,kw.                                                                                                                                                                                                                                                                                                                                                                                         | 22594   |
| 48 pharmacovigilan\$.tw,kw.                                                                                                                                                                                                                                                                                                                                                                                                             | 16509   |
| ((drug\$ or pharm\$) adj2 (approv\$ or cost\$ or develop\$ or design\$ or discover\$ or disposal\$ or evaluat\$ or industr\$ or legislat\$ or manufacture\$ or market\$ or                                                                                                                                                                                                                                                              |         |
| registrat\$ or regulat\$ or recall\$ or reposition\$ or re-position\$ or research\$ or policy                                                                                                                                                                                                                                                                                                                                           |         |
| 49 or policies or service\$)).tw,kw.                                                                                                                                                                                                                                                                                                                                                                                                    | 516268  |
| 50 or/38-49 [Drug Life Cycle Concept]                                                                                                                                                                                                                                                                                                                                                                                                   | 1360829 |
| 51 37 and 50                                                                                                                                                                                                                                                                                                                                                                                                                            | 10638   |
| 52 limit 51 to yr="2010 -Current"                                                                                                                                                                                                                                                                                                                                                                                                       | 6628    |
| (rat or rats or mouse or mice or swine or porcine or murine or sheep or lambs or                                                                                                                                                                                                                                                                                                                                                        |         |
| pigs or piglets or rabbit or rabbits or cat or cats or dog or dogs or cattle or bovine or                                                                                                                                                                                                                                                                                                                                               |         |
| 53 monkey or monkeys or trout or marmoset\$1).ti. and animal experiment/                                                                                                                                                                                                                                                                                                                                                                | 1068382 |
| 54 Animal experiment/ not (human experiment/ or human/)                                                                                                                                                                                                                                                                                                                                                                                 | 2256117 |
| 55 53 or 54                                                                                                                                                                                                                                                                                                                                                                                                                             | 2304562 |
| 56 52 not 55                                                                                                                                                                                                                                                                                                                                                                                                                            | 6409    |
| 57 56 use oemezd                                                                                                                                                                                                                                                                                                                                                                                                                        | 5261    |
| 58 28 or 57                                                                                                                                                                                                                                                                                                                                                                                                                             | 7096    |
| 59 limit 58 to yr="1860 - 2015"                                                                                                                                                                                                                                                                                                                                                                                                         | 3196    |

|                                    |      |
|------------------------------------|------|
| 60 limit 58 to yr="2016 - Current" | 3900 |
| 61 remove duplicates from 59       | 2802 |
| 62 remove duplicates from 60       | 3370 |
| 63 61 use medall                   | 891  |
| 64 62 use medall                   | 937  |
| 65 61 use oemezd                   | 1911 |
| 66 62 use oemezd                   | 2433 |
| 67 63 or 64                        | 1828 |
| 68 65 or 66                        | 4344 |
